# Supplementary material
Source: HighWire-hosted journal article supplement (https://www.ajnr.org/highwire/filestream/61094/field_highwire_adjunct_files/0/17-01213.pdf)
Supplement: 17-01213.pdf [file 17-01213.pdf]

## ON-LINE APPENDIX

### Overview of Convolutional Neural Networks

CNNs are an adaption of the traditional artificial neural network architecture whereby banks of 2D convolutional filter parameters and nonlinear activation functions act as a mapping function to transform a multidimensional input image into a desired output.<sup>1</sup> The banks of 2D convolutional operation are defined by

$$C_l = \sum_k x_k W_{kl} + b_l,$$

where the  $l$ th convolutional output  $C_l$  is the result of convolution between the  $k$ th input feature map  $x_k$ , and the  $l$ th subparameters  $w_{kl}$  and  $b_l$  are the  $l$ th additive bias terms. Because each convolutional layer acts on a total of  $k$  input feature maps, each parameter of size  $i \times j$  consists of a total of  $i \times j \times k \times l$  parameters, in which  $l$  is the number of output feature maps.

Each convolutional operation is then followed by a nonlinear activation function,  $\sigma$ . In this study, the rectified linear activation function was used, given well-documented advantages, including stable gradients at the extreme values of optimization.<sup>2</sup> The rectified linear operation is defined simply by

$$x_l = \sigma(C_l) = \max(C_l, 0),$$

where the  $l$ th activation map  $x_l$  represents the convolutional output  $C_l$  described above with the threshold at zero. Stacking serial convolutional and nonlinear activation functions allows a CNN to model high-order complex feature representations in a mathematically efficient form.

### Convolutional Neural Network: Architectural Details

A customized CNN based on the popular ResNet was designed for classification of mutation status, comprising 4 residual blocks (On-line Figure). Batch normalization is used between the convolutional and rectified linear layers to limit drift of layer activations during training.<sup>3</sup> Dropout at 50% was applied to all convolutional and fully connected layers to limit overfitting and add stochasticity to the training process.<sup>4,5</sup> Feature maps were downsampled from the previous layer by convolutions with a stride length of 2 instead of max pooling, thus allowing the network to learn downsampling parameters and facilitating preservation of gradients during backpropagation.<sup>6</sup> The number of activation channels in deeper layers was progressively increased from 8 to 16 to 32 to 64, reflecting increased feature complexity. The final single-dimensional feature vector was obtained through use of a global average pool applied to the penultimate  $4 \times 4 \times 64$  convolutional feature map instead of implementing a costly, high-parameter intermediate fully convolutional layer.

Final classification error was determined using a softmax cross-entropy loss function, defined by

$$y = - \sum_l (x_{lc} - \log \sum_{d=1}^D e^{x_{ld}}),$$

where the loss,  $y$ , is calculated by subtracting the  $l$ th activation map of the ground truth class,  $c$ , with the sum of the softmax normalized (exponential function) values of the remaining class dimensions,  $D$ .

### Data Augmentation

Real-time data augmentation was applied to all input images during the training process. This included the following: 1) addition of a random offset  $i$  on the interval of  $(-0.5$  and  $0.5)$  to the whole image; 2) arbitrary removal of an entire channel within the input in 50% of training cases; and 3) application of a random  $3 \times 3$  affine transformation matrix independently to each input channel, resulting in stochastic application of image scaling, rotation, translation, and shear. "Channels" refer to 1 of the 4 input modalities (ie, T2, FLAIR, and so forth). Given a 2D affine matrix,

$$\begin{bmatrix} s_1 & t_1 & r_1 \\ t_2 & s_2 & r_2 \\ 0 & 0 & 1 \end{bmatrix},$$

the random affine transformation was initialized with random uniform distributions of interval  $s_1, s_2 \in (0.8, 1.2)$ ,  $t_1, t_2 \in (-0.3, 0.3)$ , and  $r_1, r_2 \in (-16, 16)$ .

### Implementation Details

Training was implemented using the Adam optimizer, an algorithm for first-order gradient-based optimization of stochastic objective functions, based on adaptive estimates of lower-order moments.<sup>7</sup> Parameters were initialized using the heuristic described by He et al.<sup>8</sup> L2 regularization was implemented to prevent over-fitting of data by limiting the squared magnitude of the convolutional weights. To account for training dynamics, the learning rate was annealed and the mini-batch size is increased whenever training loss plateaus. Furthermore a normalized gradient algorithm was employed to allow for locally adaptive learning rates that adjust according to changes in the input signal.<sup>9</sup> Software code for this study was written in Python 3.5 using the open-source TensorFlow r1.0 library (Apache 2.0 license).<sup>10</sup> Experiments were performed on a GPU-optimized workstation with a single NVIDIA GeForce GTX Titan X (12GB, Maxwell architecture).

## REFERENCES

1. LeCun Y, Bengio Y. **Convolutional networks for images, speech, and time-series**. In: Arbib MA, ed. *The Handbook of Brain Theory and Neural Networks*. Cambridge: MIT Press; 1998:255–58
2. Nair V, Hinton GE. **Rectified linear units improve restricted Boltzmann machines**. In: *Proceedings of the 27th International Conference on Machine Learning*. Haifa, Israel: Omnipress; 2010:807–14
3. Ioffe S, Szegedy C. **Batch normalization: accelerating deep network training by reducing internal covariate shift**. *PMLR* 2015;37:448–56
4. Srivastava N, Hinton G, Krizhevsky A, et al. **Dropout: a simple way to prevent neural networks from overfitting**. *J Mach Learn Res* 2014; 15:1929–58
5. Baldi P, Sadowski P. **The dropout learning algorithm**. *Artif Intell* 2014;210:78–122 [CrossRef Medline](#)
6. Springenberg JT, Dosovitskiy A, Brox T, et al. **Striving for simplicity: the all convolutional net**. *CoRR* 2014;abs/1412.6806. <https://arxiv.org/abs/1412.6806>. Accessed August 30, 2017
7. Kingma DP, Ba J. **Adam: a method for stochastic optimization**. *CoRR* 2014;abs/1412.6980. <https://arxiv.org/abs/1412.6980>. Accessed August 30, 2017
8. He K, Zhang X, Ren S, et al. **Delving deep into rectifiers: surpassing human-level performance on ImageNet classification**. In: *Proceedings of the 2015 IEEE International Conference on Computer Vision*, Santiago, Chile. December 7–13, 2015:1026–34 [CrossRef](#)

9. Mandic DP. **A generalized normalized gradient descent algorithm.** *IEEE Signal Process Lett* 2004;11:115–18 CrossRef
10. Abadi M, Agarwal A, Barham P, et al. **TensorFlow: large-scale machine learning on heterogeneous distributed systems.** *CoRR* 2015; abs/1603.04467. <https://arxiv.org/abs/1603.04467>. Accessed August 30, 2017

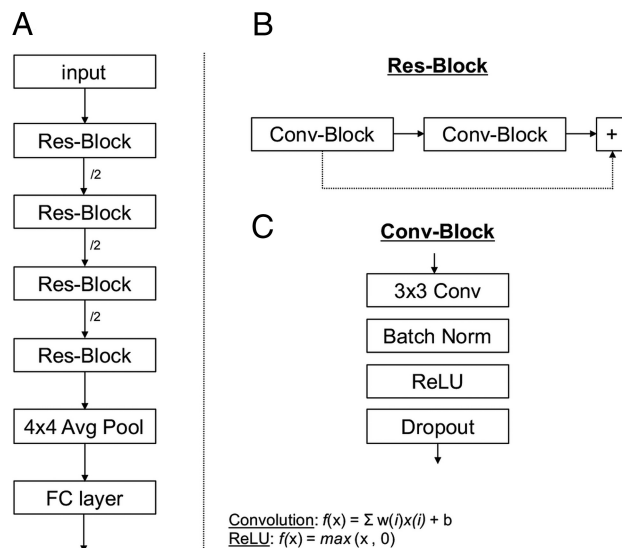

**ON-LINE FIGURE.** A, Summary of residual neural network architecture. Four residual blocks are used, subsampling the feature map 3 times through convolutions with a stride of 2 (demarcated by /2 in the figure). B, Each residual block consists of 2 serial  $3 \times 3$  convolutional blocks; the latter is mapped to the former via an additional operation. C, Each convolutional block consists of a  $3 \times 3$  convolution, batch normalization, a rectified linear nonlinearity, and 50% drop-out.
